# Supplementary material for: Efficient electrocatalytic oxidation ofp-phenylenediamine using a novel PANI/ZnO anchored bio-reduced graphene oxide nanocomposite
Source: Royal Society of Chemistry journal article supplement (doi:10.1039/c9nj00837c), 2019-01-01
Supplement: c9nj00837c1.pdf [file c9nj00837c1.pdf]

## Supporting Information

# Efficient electrocatalytic oxidation of *p*-phenylenediamine using a novel PANI/ZnO anchored bio-reduced graphene oxide nanocomposite

Manorama Singh<sup>a</sup> Anjumala Sahu,<sup>a</sup> Suhasini Mahata<sup>a</sup> Prashant Shukla,<sup>b</sup> Ankita Rai<sup>b</sup> and Vijai K. Rai<sup>a\*</sup>

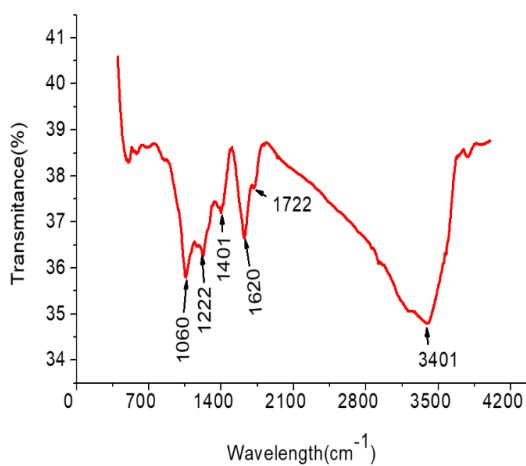

**Fig S1.** FTIR of GO

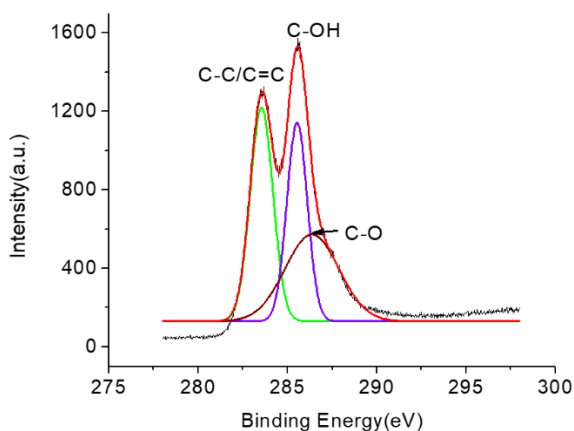

**Fig S2.** XPS of GO

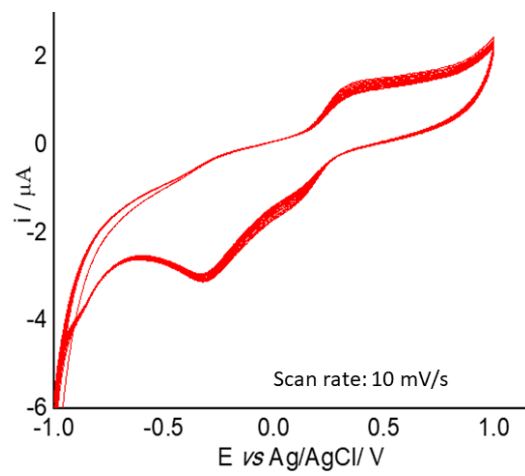

**Fig. S3.** Stability of PANI/ZnO-starch-rGO immobilized in nafion film modified GCE
